# Supplementary material for: New Fluorophore and Its Applications in Visualizing Polystyrene Nanoplastics in Bean Sprouts and HeLa Cells
Source: MDPI journal article supplement (doi:10.3390/molecules28207102), 2023-10-15
Supplement: s1 [file s1]

# SUPPLEMENTARY DATA 1

## New Fluorophore and its Applications in Visualizing Polystyrene

### Nanoplastics in Bean Sprouts and HeLa Cells

Guo-wen Xing<sup>1\*</sup>, Jerry Gao<sup>2</sup>, Heng Wang<sup>2</sup>, Yi-chen Liu<sup>1</sup>

1. College of Chemistry, Beijing Normal University, Beijing, 100875, China. E-mail: gwxing@bnu.edu.cn
2. Beijing No. 80 High School, Beijing, 100102, China

## (1) Density functional theory (DFT) calculations

### Supplementary Data.

#### Calculation 1

#### TPEF HOMOLUMO

Method: #p opt freq 6-311+g(d,p) pop=full ginput

TPEF -2155.640432 a.u. (zero imaginary freq)

- Calculation Type: FREQ
- Calculation Method: RB3LYP
- Basis Set: 6-311+G(d,p)
- Charge: 1
- Spin: Singlet
- E(RB3LYP): -2155.6404 Hartree
- RMS Gradient Norm: 4.00e-06 Hartree/Bohr
- Imaginary Freq: 0
- Dipole Moment: 14.115731 Debye
- Polarizability ( $\alpha$ ): 726.37401 a.u.

The coordinates of the optimized structures

|   |             |             |             |
|---|-------------|-------------|-------------|
| C | -1.71373100 | -0.11737900 | 0.05283300  |
| C | -2.53255700 | -1.26927100 | -0.00274300 |
| C | -3.94575000 | -1.12406300 | -0.02364700 |
| O | -4.50711700 | 0.11805500  | 0.00725800  |
| C | -3.74737700 | 1.24858900  | 0.05680700  |
| C | -2.32803300 | 1.15390500  | 0.08466400  |
| C | -2.04108400 | -2.60020600 | -0.08302200 |
| C | -2.86365800 | -3.69233000 | -0.12923600 |
| C | -4.29372100 | -3.50619500 | -0.13057800 |
| C | -4.82888100 | -2.18910600 | -0.09061400 |
| C | -4.43756200 | 2.44821500  | 0.07812200  |
| C | -3.68781600 | 3.65518800  | 0.13352900  |
| C | -2.24944300 | 3.59626100  | 0.22249100  |
| C | -1.61986100 | 2.38387100  | 0.18715100  |
| N | -4.31659200 | 4.85945900  | 0.11713600  |
| C | -3.60011800 | 6.14294500  | 0.05217200  |
| C | -2.16730900 | 5.99176400  | -0.43747500 |
| C | -1.47352800 | 4.88351900  | 0.35455400  |
| C | -2.28531200 | -5.08958100 | -0.16352500 |
| C | -3.24828000 | -6.06676500 | -0.83322200 |
| C | -4.61415400 | -5.96286900 | -0.16985600 |
| N | -5.12343600 | -4.58543800 | -0.19020900 |
| C | -6.57350000 | -4.42899800 | -0.03217600 |

|   |             |             |             |
|---|-------------|-------------|-------------|
| C | -7.06357900 | -3.15145300 | -0.69921400 |
| C | -6.32160900 | -1.94465600 | -0.12724800 |
| C | -5.94765000 | 2.48570200  | 0.05493500  |
| C | -6.45285000 | 3.75995800  | 0.73176300  |
| C | -5.78066000 | 4.97895600  | 0.11875700  |
| C | -0.23479300 | -0.24077400 | 0.07637500  |
| C | 0.54439900  | 0.27453300  | -0.96902200 |
| C | 1.92897900  | 0.15907900  | -0.94567900 |
| C | 2.58975800  | -0.46050700 | 0.12570100  |
| C | 1.80200500  | -0.99025200 | 1.16000800  |
| C | 0.41719400  | -0.88042000 | 1.14093500  |
| C | 4.07434400  | -0.61366700 | 0.14534700  |
| C | 4.91907000  | 0.42797500  | -0.08982000 |
| C | 4.55280600  | -1.99618200 | 0.45362100  |
| C | 6.38522700  | 0.24672000  | -0.30567200 |
| C | 4.44962000  | 1.84635600  | -0.13611400 |
| C | 4.04655700  | -3.10004200 | -0.24910400 |
| C | 4.47599100  | -4.39176100 | 0.04327100  |
| C | 5.40371500  | -4.60800800 | 1.06169100  |
| C | 5.89878400  | -3.52221800 | 1.78213500  |
| C | 5.47953400  | -2.22932200 | 1.47951700  |
| C | 7.30843000  | 1.05186700  | 0.37903900  |
| C | 8.67674600  | 0.90185000  | 0.17276000  |
| C | 9.14865100  | -0.03772100 | -0.74309500 |
| C | 8.24146300  | -0.82674200 | -1.44866200 |
| C | 6.87375700  | -0.68887800 | -1.22932000 |
| C | 4.79694900  | 2.67705300  | -1.21248600 |
| C | 4.38649600  | 4.00645400  | -1.25011700 |
| C | 3.64512300  | 4.54205400  | -0.19660300 |
| C | 3.31500000  | 3.73518500  | 0.89132400  |
| C | 3.70966000  | 2.39932300  | 0.91874700  |
| H | -0.96966000 | -2.75230800 | -0.10386400 |
| H | -0.53994800 | 2.35291500  | 0.25196000  |
| H | -4.16541400 | 6.79748800  | -0.61780800 |
| H | -3.61798900 | 6.60781000  | 1.04686000  |
| H | -1.64948900 | 6.94632700  | -0.32031600 |
| H | -2.16169100 | 5.74618200  | -1.50423600 |
| H | -1.41863400 | 5.17525800  | 1.41149800  |
| H | -0.44645700 | 4.73547000  | 0.01495600  |
| H | -2.08899000 | -5.42511700 | 0.86281300  |
| H | -1.32016900 | -5.07578800 | -0.67505200 |
| H | -2.88403900 | -7.09311000 | -0.74942000 |
| H | -3.34107500 | -5.83792000 | -1.89960000 |
| H | -5.34302800 | -6.58639600 | -0.69195500 |
| H | -4.56330300 | -6.32375700 | 0.86725600  |
| H | -7.04916300 | -5.30386100 | -0.47882600 |
| H | -6.83186800 | -4.42860200 | 1.03628300  |
| H | -8.14020100 | -3.04978700 | -0.54514100 |
| H | -6.89365200 | -3.22213200 | -1.77801900 |
| H | -6.68419800 | -1.73138900 | 0.88621400  |
| H | -6.53403300 | -1.05227900 | -0.71904800 |
| H | -6.30853700 | 2.44722600  | -0.98091600 |
| H | -6.34878400 | 1.60207300  | 0.55319700  |
| H | -7.53553500 | 3.85548700  | 0.62371700  |
| H | -6.23475600 | 3.72229400  | 1.80379800  |
| H | -6.03409100 | 5.88004000  | 0.68393200  |
| H | -6.12882900 | 5.13561100  | -0.91125800 |
| H | 0.06199600  | 0.74708700  | -1.81739700 |
| H | 2.50809100  | 0.55034200  | -1.77271700 |
| H | 2.28384900  | -1.48814900 | 1.99340100  |

|   |             |             |             |
|---|-------------|-------------|-------------|
| H | -0.16263300 | -1.27727400 | 1.96681400  |
| H | 3.32243900  | -2.94225900 | -1.04125700 |
| H | 4.08865600  | -5.23020000 | -0.52511400 |
| H | 5.73597600  | -5.61355400 | 1.29299000  |
| H | 6.61433300  | -3.68104400 | 2.58100000  |
| H | 5.87388000  | -1.39072300 | 2.04078900  |
| H | 6.95084900  | 1.79546600  | 1.08239200  |
| H | 9.37477300  | 1.52315000  | 0.72249000  |
| H | 10.21380500 | -0.14833400 | -0.91108400 |
| H | 8.59885100  | -1.54997000 | -2.17301300 |
| H | 6.17653000  | -1.30691000 | -1.78193600 |
| H | 5.39402700  | 2.27545800  | -2.02348200 |
| H | 4.65851900  | 4.62922100  | -2.09497900 |
| H | 3.34663700  | 5.58430700  | -0.21545800 |
| H | 2.76522400  | 4.14979200  | 1.72949300  |
| H | 3.46021500  | 1.78152200  | 1.77349300  |

Table S1 Photophysical Properties of the TPEF in Various Solvents

| Solvent                         | Absorption Peak (nm) | Emission Peak (nm) | Stokes' Shift (nm) |
|---------------------------------|----------------------|--------------------|--------------------|
| Ethanol                         | 580.0                | 604.0              | 24.0               |
| MeCN                            | 580.0                | 606.0              | 26.0               |
| Methanol                        | 579.0                | 603.0              | 24.0               |
| Acetone                         | 581.0                | 607.0              | 26.0               |
| CHCl <sub>3</sub>               | 580.0                | 600.0              | 20.0               |
| Ethyl Estate                    | 581.0                | 605.0              | 24.0               |
| CH <sub>2</sub> Cl <sub>2</sub> | 580.0                | 601.0              | 21.0               |
| THF                             | 583.0                | 607.0              | 24.0               |

**Calculation 2:****Computational UV Calculations for TPEF:**

- Calculation Type: FREQ
- Calculation Method: RB3LYP TD-FC
- Basis Set: 6-311+G(d,p)
- Charge: 1
- Spin: Singlet
- Solvation: scrf=(cpcm,solvent=methanol)
- E(TD-HF/TD-DFT): -2155.6077 Hartree
- RMS Gradient Norm: 3.33e-06 Hartree/Bohr
- Imaginary Freq: 0
- Dipole Moment: 17.483934 Debye
- Polarizability ( $\alpha$ ): 1221.9903 a.u.
- **Calculated wavelength: 565.97 nm**

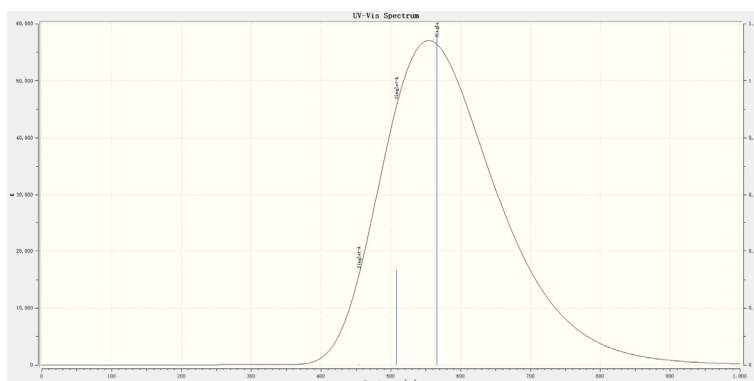

Figure S1 Calculated UV of TPEF in methanol from Calculation 2

The coordinates of the optimized structures

|   |             |             |             |
|---|-------------|-------------|-------------|
| C | 1.68776300  | 0.07448300  | 0.16710100  |
| C | 2.43258000  | 1.28725300  | -0.01301900 |
| C | 3.84945000  | 1.24630300  | -0.09728800 |
| O | 4.52628800  | 0.06083000  | 0.01955400  |
| C | 3.85452400  | -1.11654700 | 0.21868300  |
| C | 2.43710400  | -1.14604200 | 0.28200700  |
| C | 1.85177300  | 2.58293300  | -0.06310300 |
| C | 2.58787700  | 3.73394200  | -0.22342700 |
| C | 4.01538900  | 3.64399900  | -0.35799500 |
| C | 4.64574800  | 2.36579400  | -0.28769200 |
| C | 4.65472000  | -2.24418400 | 0.32768300  |
| C | 4.02258100  | -3.51505700 | 0.48186500  |
| C | 2.58929000  | -3.59092100 | 0.51831800  |
| C | 1.85167800  | -2.43533500 | 0.40600000  |
| N | 4.77403600  | -4.64908500 | 0.57012000  |
| C | 4.17792800  | -5.98970600 | 0.61249100  |
| C | 2.77662700  | -6.02425700 | 0.02071300  |
| C | 1.92198800  | -4.93465900 | 0.66694200  |
| C | 1.91413900  | 5.08478700  | -0.23128600 |
| C | 2.72932700  | 6.09405900  | -1.03678000 |
| C | 4.16403100  | 6.10946700  | -0.52945400 |
| N | 4.76484000  | 4.77251900  | -0.54276000 |
| C | 6.22773200  | 4.72349700  | -0.49685400 |
| C | 6.75841400  | 3.43499000  | -1.10830700 |
| C | 6.14496500  | 2.22695200  | -0.40331800 |
| C | 6.15825100  | -2.14497500 | 0.28557000  |
| C | 6.78281000  | -3.28865100 | 1.08405800  |
| C | 6.23981000  | -4.62280200 | 0.59880100  |
| C | 0.21702800  | 0.08115600  | 0.23760700  |
| C | -0.56299800 | 0.64563000  | -0.78966800 |
| C | -1.95061300 | 0.64649600  | -0.72472800 |
| C | -2.62968700 | 0.09911700  | 0.37524700  |
| C | -1.85297700 | -0.43875200 | 1.41471000  |
| C | -0.46643400 | -0.46530200 | 1.34116000  |
| C | -4.11698500 | 0.13701000  | 0.47359300  |
| C | -4.93438700 | -0.26711000 | -0.53765700 |
| C | -4.64571800 | 0.65153800  | 1.77497000  |
| C | -6.40446600 | 0.00149000  | -0.54090500 |
| C | -4.43248400 | -1.01935400 | -1.72767300 |
| C | -4.19068700 | 1.87138400  | 2.29874100  |
| C | -4.66449400 | 2.34741300  | 3.51919900  |
| C | -5.58661400 | 1.60028400  | 4.25374600  |
| C | -6.02997900 | 0.37492300  | 3.75577600  |

|   |              |             |             |
|---|--------------|-------------|-------------|
| C | -5.56537400  | -0.09303600 | 2.52788700  |
| C | -7.31910500  | -1.03355800 | -0.79157800 |
| C | -8.69010400  | -0.78808400 | -0.81296400 |
| C | -9.17534800  | 0.50453500  | -0.60836700 |
| C | -8.27655000  | 1.54726700  | -0.38223700 |
| C | -6.90602500  | 1.29739400  | -0.34703600 |
| C | -4.75966000  | -0.60273000 | -3.02754800 |
| C | -4.31181100  | -1.31113300 | -4.14027200 |
| C | -3.54717300  | -2.46709100 | -3.97560000 |
| C | -3.23457000  | -2.90599600 | -2.68868900 |
| C | -3.67091200  | -2.18789500 | -1.57696600 |
| H | 0.77912800   | 2.67239300  | 0.04539200  |
| H | 0.77275500   | -2.51460100 | 0.40600800  |
| H | 4.84803400   | -6.65922800 | 0.06695000  |
| H | 4.16221600   | -6.33135200 | 1.65722300  |
| H | 2.34678400   | -7.01368500 | 0.19003200  |
| H | 2.82875600   | -5.86821700 | -1.06153200 |
| H | 1.79057400   | -5.16381300 | 1.73275000  |
| H | 0.92257500   | -4.90253300 | 0.22765400  |
| H | 1.81273500   | 5.44520000  | 0.80090000  |
| H | 0.90115300   | 4.98946700  | -0.62866300 |
| H | 2.30957000   | 7.09790200  | -0.94406300 |
| H | 2.71919300   | 5.82905400  | -2.09877100 |
| H | 4.79114200   | 6.75406400  | -1.14835000 |
| H | 4.20079300   | 6.50864100  | 0.49554300  |
| H | 6.60251600   | 5.59597800  | -1.03380000 |
| H | 6.55909300   | 4.81587900  | 0.54856600  |
| H | 7.84679900   | 3.41822000  | -1.02101600 |
| H | 6.51394700   | 3.41471700  | -2.17484600 |
| H | 6.57745400   | 2.12331500  | 0.60030400  |
| H | 6.39030400   | 1.30629200  | -0.93512900 |
| H | 6.50310500   | -2.18753800 | -0.75603200 |
| H | 6.47867900   | -1.17899200 | 0.67662300  |
| H | 7.86938800   | -3.28831900 | 0.97657200  |
| H | 6.55782700   | -3.16583700 | 2.14815500  |
| H | 6.56789600   | -5.43762300 | 1.24967400  |
| H | 6.61282200   | -4.84751500 | -0.41085400 |
| H | -0.07471000  | 1.07233000  | -1.65837400 |
| H | -2.51788300  | 1.08266800  | -1.53813300 |
| H | -2.34258300  | -0.84607700 | 2.29217200  |
| H | 0.09875400   | -0.88801000 | 2.16397900  |
| H | -3.46836500  | 2.45587600  | 1.73967900  |
| H | -4.31146000  | 3.30000700  | 3.89860400  |
| H | -5.95013400  | 1.96632200  | 5.20731900  |
| H | -6.73540300  | -0.22016700 | 4.32524600  |
| H | -5.91234100  | -1.04757400 | 2.15015900  |
| H | -6.95274900  | -2.04011800 | -0.96014800 |
| H | -9.37982300  | -1.60529500 | -0.99309600 |
| H | -10.24184200 | 0.69790000  | -0.63281300 |
| H | -8.64187000  | 2.55804100  | -0.23741400 |
| H | -6.21543800  | 2.11443100  | -0.17533200 |
| H | -5.36102900  | 0.28881300  | -3.16663200 |
| H | -4.56335700  | -0.96317600 | -5.13609700 |
| H | -3.20558500  | -3.02382200 | -4.84092600 |
| H | -2.65450200  | -3.81161400 | -2.54921300 |
| H | -3.42759700  | -2.53858600 | -0.58094100 |

**Calculation 3**

- Calculation Method: RB3LYP TD-FC
- Basis Set: 6-311+G(d,p)
- Spin: Singlet
- Solvation: scrf=solvent=methanol
- E(TD-HF/TD-DFT): -2155.6073 Hartree
- RMS Gradient Norm: 2.239e-06 Hartree/Bohr
- Imaginary Freq: 0
- Dipole Moment: 17.442659 Debye
- Polarizability ( $\alpha$ ): 1216.4905 a.u.
- **Calculated wavelength: 565.17 nm**

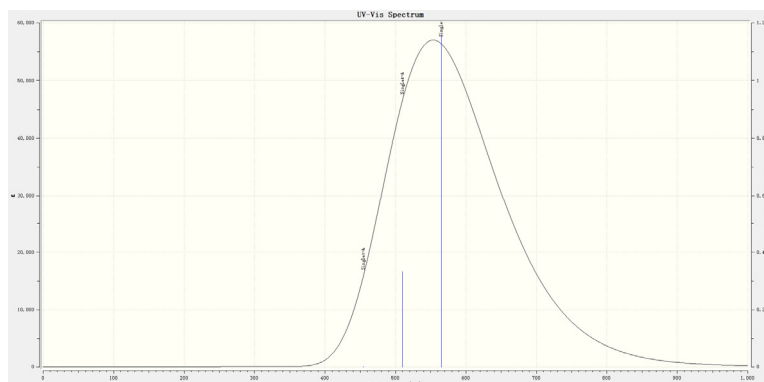

Figure S2 Calculated UV of TPEF in methanol from Calculation 3

The coordinates of the optimized structures

|   |             |             |             |
|---|-------------|-------------|-------------|
| C | 1.68771800  | 0.07331600  | 0.16754400  |
| C | 2.43148600  | 1.28711600  | -0.01052900 |
| C | 3.84831300  | 1.24754400  | -0.09545600 |
| O | 4.52629000  | 0.06263100  | 0.01973200  |
| C | 3.85572200  | -1.11561300 | 0.21723900  |
| C | 2.43838100  | -1.14669600 | 0.28022300  |
| C | 1.84964500  | 2.58242400  | -0.05782300 |
| C | 2.58469000  | 3.73422900  | -0.21704800 |
| C | 4.01210100  | 3.64564400  | -0.35334000 |
| C | 4.64360000  | 2.36802100  | -0.28486900 |
| C | 4.65712900  | -2.24261600 | 0.32488000  |
| C | 4.02630800  | -3.51425100 | 0.47731400  |
| C | 2.59309200  | -3.59186400 | 0.51181300  |
| C | 1.85432300  | -2.43686100 | 0.40108400  |
| N | 4.77904100  | -4.64755200 | 0.56555600  |
| C | 4.18403700  | -5.98861600 | 0.60737600  |
| C | 2.78451300  | -6.02460900 | 0.01148200  |
| C | 1.92676100  | -4.93661600 | 0.65624500  |
| C | 1.90996100  | 5.08457500  | -0.22184700 |
| C | 2.72287200  | 6.09530700  | -1.02779300 |
| C | 4.15846700  | 6.11149500  | -0.52301200 |
| N | 4.76037800  | 4.77508400  | -0.53785200 |
| C | 6.22330800  | 4.72737600  | -0.49322100 |
| C | 6.75472500  | 3.43980600  | -1.10606000 |
| C | 6.14285600  | 2.23061900  | -0.40159500 |
| C | 6.16056200  | -2.14167500 | 0.28315000  |
| C | 6.78631500  | -3.28529800 | 1.08077500  |
| C | 6.24472000  | -4.61971600 | 0.59458200  |
| C | 0.21717600  | 0.07848400  | 0.23807800  |
| C | -0.56338900 | 0.64653500  | -0.78689300 |

|   |             |             |             |
|---|-------------|-------------|-------------|
| C | -1.95091200 | 0.64646800  | -0.72178300 |
| C | -2.62975300 | 0.09458900  | 0.37614700  |
| C | -1.85250300 | -0.44719700 | 1.41324700  |
| C | -0.46600400 | -0.47288200 | 1.33942300  |
| C | -4.11699500 | 0.13166900  | 0.47521700  |
| C | -4.93486900 | -0.26466200 | -0.53897800 |
| C | -4.64526300 | 0.63609100  | 1.78074000  |
| C | -6.40478800 | 0.00464600  | -0.54026500 |
| C | -4.43353900 | -1.00838000 | -1.73456700 |
| C | -4.18772300 | 1.85029100  | 2.31534000  |
| C | -4.66088200 | 2.31671300  | 3.53971700  |
| C | -5.58495200 | 1.56534400  | 4.26738000  |
| C | -6.03097000 | 0.34546800  | 3.75852100  |
| C | -5.56699100 | -0.11278500 | 2.52681100  |
| C | -7.31960300 | -1.02721100 | -0.80319600 |
| C | -8.69046000 | -0.78106300 | -0.82317100 |
| C | -9.17546200 | 0.50934900  | -0.60480700 |
| C | -8.27653500 | 1.54914600  | -0.36623400 |
| C | -6.90617900 | 1.29845600  | -0.33251900 |
| C | -4.76290700 | -0.58349100 | -3.03120900 |
| C | -4.31571100 | -1.28385800 | -4.14922600 |
| C | -3.54956500 | -2.43999100 | -3.99333900 |
| C | -3.23482100 | -2.88715300 | -2.70982800 |
| C | -3.67046100 | -2.17703500 | -1.59277500 |
| H | 0.77708100  | 2.67096700  | 0.05217300  |
| H | 0.77549900  | -2.51736900 | 0.39939600  |
| H | 4.85633400  | -6.65810400 | 0.06452100  |
| H | 4.16523100  | -6.32940500 | 1.65238300  |
| H | 2.35538300  | -7.01469900 | 0.17878800  |
| H | 2.83958600  | -5.86765500 | -1.07048200 |
| H | 1.79188500  | -5.16754500 | 1.72122800  |
| H | 0.92881500  | -4.90486900 | 0.21357600  |
| H | 1.81037400  | 5.44366100  | 0.81099200  |
| H | 0.89626000  | 4.98904300  | -0.61734300 |
| H | 2.30244000  | 7.09872600  | -0.93349000 |
| H | 2.71104900  | 5.83123900  | -2.09000200 |
| H | 4.78393100  | 6.75683200  | -1.14284300 |
| H | 4.19676300  | 6.51037500  | 0.50205600  |
| H | 6.59691900  | 5.60066300  | -1.02971700 |
| H | 6.55549300  | 4.81929300  | 0.55200000  |
| H | 7.84320600  | 3.42394700  | -1.01966400 |
| H | 6.50944500  | 3.42014200  | -2.17242000 |
| H | 6.57618300  | 2.12637800  | 0.60163000  |
| H | 6.38863700  | 1.31062300  | -0.93436100 |
| H | 6.50569000  | -2.18294200 | -0.75842900 |
| H | 6.47981300  | -1.17562400 | 0.67501100  |
| H | 7.87290700  | -3.28378000 | 0.97333000  |
| H | 6.56125200  | -3.16348600 | 2.14497700  |
| H | 6.57375200  | -5.43451200 | 1.24502000  |
| H | 6.61809100  | -4.84347800 | -0.41519700 |
| H | -0.07544500 | 1.07644900  | -1.65420400 |
| H | -2.51836000 | 1.08522300  | -1.53364800 |
| H | -2.34176900 | -0.85788600 | 2.28932000  |
| H | 0.09946600  | -0.89846100 | 2.16057200  |
| H | -3.46367100 | 2.43788200  | 1.76179400  |
| H | -4.30582800 | 3.26514300  | 3.92759100  |
| H | -5.94809000 | 1.92392400  | 5.22393200  |
| H | -6.73821400 | -0.25284300 | 4.32233000  |
| H | -5.91635800 | -1.06297100 | 2.14046300  |
| H | -6.95342900 | -2.03188800 | -0.98294600 |

|   |              |             |             |
|---|--------------|-------------|-------------|
| H | -9.38025500  | -1.59600000 | -1.01310300 |
| H | -10.24187700 | 0.70334500  | -0.62810100 |
| H | -8.64165500  | 2.55835400  | -0.21037300 |
| H | -6.21559500  | 2.11331500  | -0.15083600 |
| H | -5.36587200  | 0.30799600  | -3.16351700 |
| H | -4.56913100  | -0.92959600 | -5.14235600 |
| H | -3.20852800  | -2.99056300 | -4.86282100 |
| H | -2.65358300  | -3.79306300 | -2.57722900 |
| H | -3.42534600  | -2.53406000 | -0.59944800 |

## (2) TPEF Staining Microplastic Particles

The microplastic particles used in this study were obtained from Dong Guan Ming Yu Xing Plastic Starting Materials Ltd. These particles consisted of polyvinyl chloride (PVC), polystyrene (PS), polymethyl methacrylate (PMMA), and polyethylene (PE). Each type of particle had a size, with PVC, PS and PMMA measuring 1  $\mu\text{m}$  and PE measuring 5  $\mu\text{m}$ . These particles were used in their form without any treatment or modifications except for the staining process explained in the manuscript.

Subsequent to the staining process, the stained microplastics were initially suspended in water before being meticulously transferred onto glass slides for ensuing qualitative analysis. Observations were conducted using a fluorescence microscope equipped with an L208F-3M830F assisted 8.3 million-pixel electronic eyepiece. Imaging was executed with an AOSVI L208F-3M830F light microscope, utilizing a light-emitting diode (LED) as the fluorescence source. A green light spectrum, ranging from 495 nm to 555 nm, was employed for the excitation of the stained microplastic particles.

The outcomes of the staining, as illustrated in Figure S5, revealed a pronounced disparity in fluorescence intensity across the various types of microplastics. A robust fluorescent dyeing effect was discerned in PS particles across three different sizes, as well as in PVC and PMMA particles. Conversely, PE particles manifested a relatively subdued fluorescence intensity under identical experimental conditions.(Figure S3)

It is crucial to emphasize that particles devoid of TPEF staining remained undetectable under the conditions specified, thereby accentuating the efficacy of TPEF as a qualitative staining agent.under the specified conditions, which underscores the effectiveness of TPEF as a staining agent.



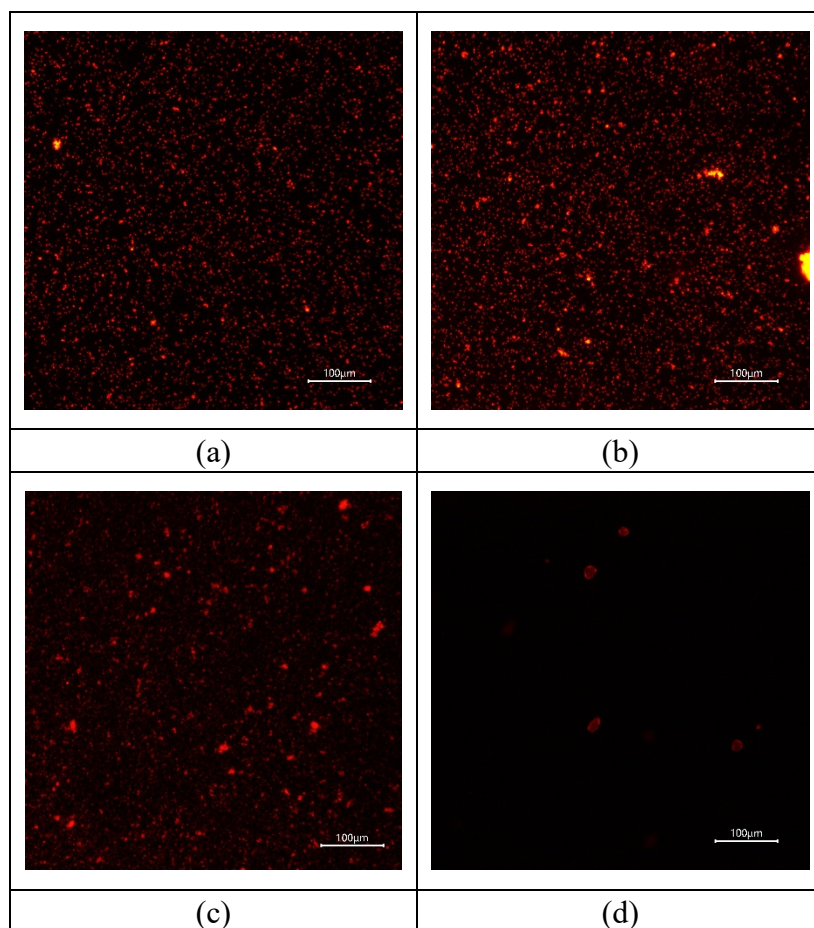

Figure S3: TPEF dyed microplastic particles(a) PVC(1 μm); (b) PMMA(1 μm); (c) PS(1 μm); (d) PE(5 μm).

### (3) TEM and SEM images of PS nanoparticles

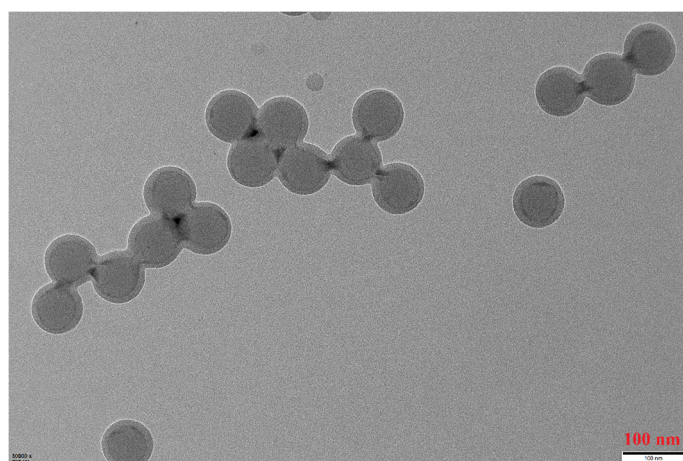

(a)

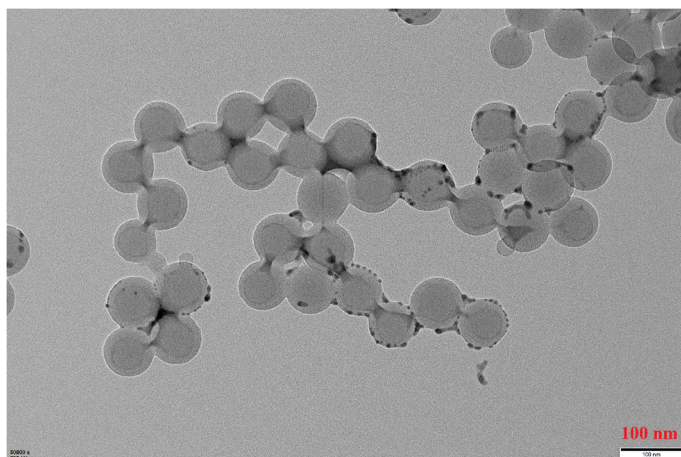

(b)

Figure S4 TEM images of PS nanoparticles. (a) Before TPEF staining; (b) After TPEF staining.

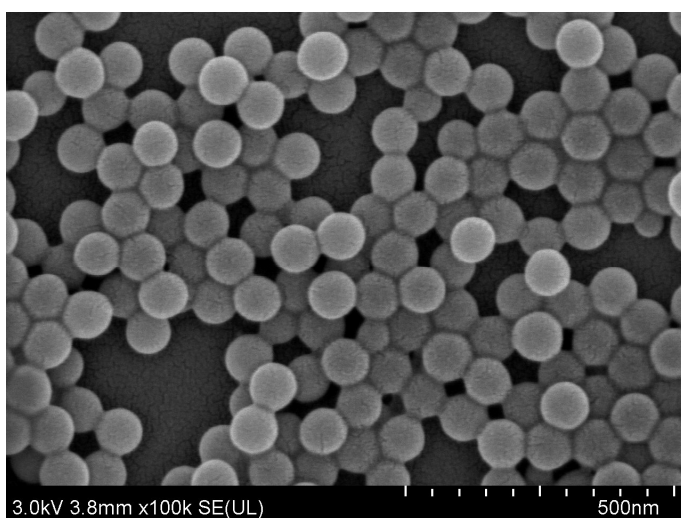

(a)

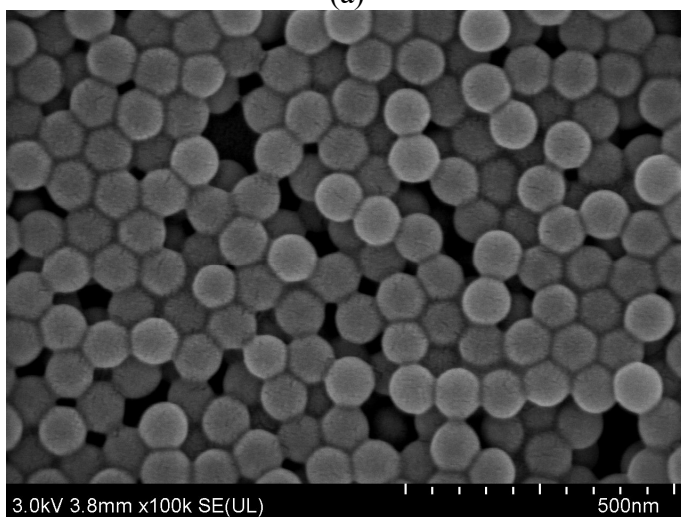

(b)

Figure S5 SEM images of PS nanoparticles. (a) Before TPEF staining; (b) After TPEF staining.

#### (4) Nanoplastic Particles in Bean Sprouts or Hela Cells

**Table S2.** CLSM images of control mung bean sprouts and soybean sprouts samples.

| Position                                                           | hypocotyl epidermis                                                                 |                                                                                     | cross-sections of hypocotyls                                                         |                                                                                       |
|--------------------------------------------------------------------|-------------------------------------------------------------------------------------|-------------------------------------------------------------------------------------|--------------------------------------------------------------------------------------|---------------------------------------------------------------------------------------|
| <div> <div>Particles</div> <div>Time</div> <div>(Day)</div> </div> | Group<br>M-water                                                                    | Group<br>M- PS                                                                      | Group<br>M-water                                                                     | Group<br>M- PS                                                                        |
| Mung<br>Bean<br>Day 1                                              | 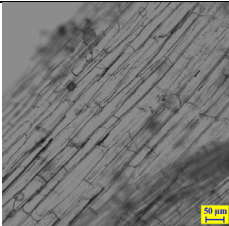   |    |    |    |
| Mung<br>Bean<br>Day 3                                              |   |   |   |   |
| Mung<br>Bean<br>Day 5                                              |  |  |  |  |
| Soybean<br>Day 1                                                   |  |  |  |  |
| Soybean<br>Day 3                                                   |  |  |  |  |
| Soybean<br>Day 5                                                   |  |  |  |  |



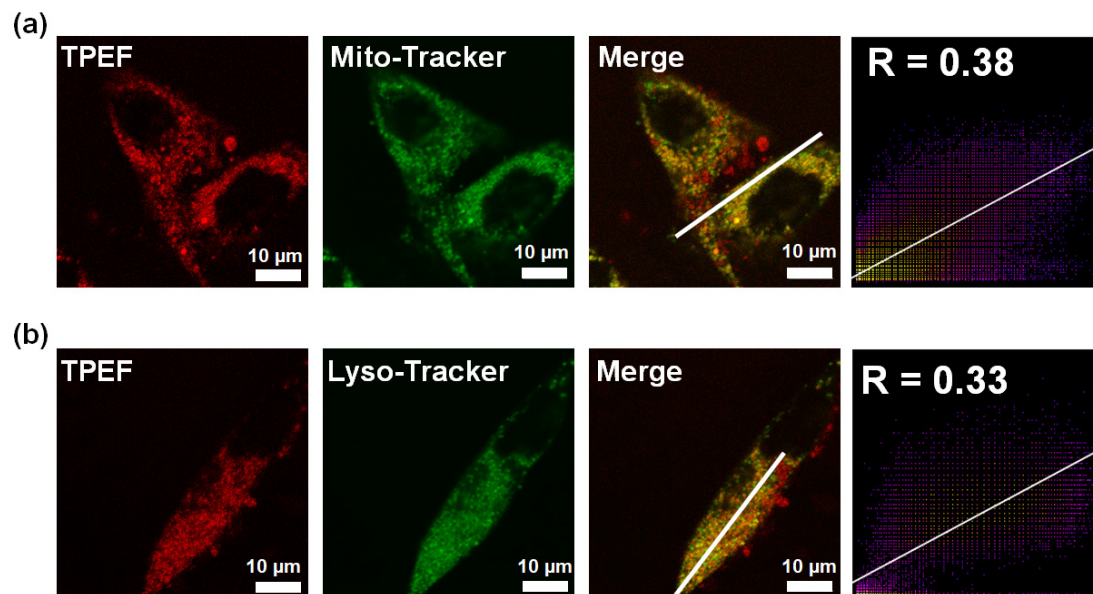

Figure.S6 Confocal images of live HeLa cells incubated with TPEF, (100  $\mu\text{g/mL}$ ,  $\lambda_{\text{ex}}$ : 561 nm,  $\lambda_{\text{em}}$ : 580-650 nm) and co-stained with (a) Mito-Tracker Green dye (1  $\mu\text{M}$ ,  $\lambda_{\text{ex}}$ :488 nm,  $\lambda_{\text{em}}$ : 500-550 nm) or (b) Lyso-Tracker Green dye (1  $\mu\text{M}$ ,  $\lambda_{\text{ex}}$ :488 nm,  $\lambda_{\text{em}}$ : 500-550 nm). Scale bar: 10  $\mu\text{m}$ .

## (5) Spectra to TPE-CHO and TPEF

### $^1\text{H}$ , $^{13}\text{C}$ NMR Spectra

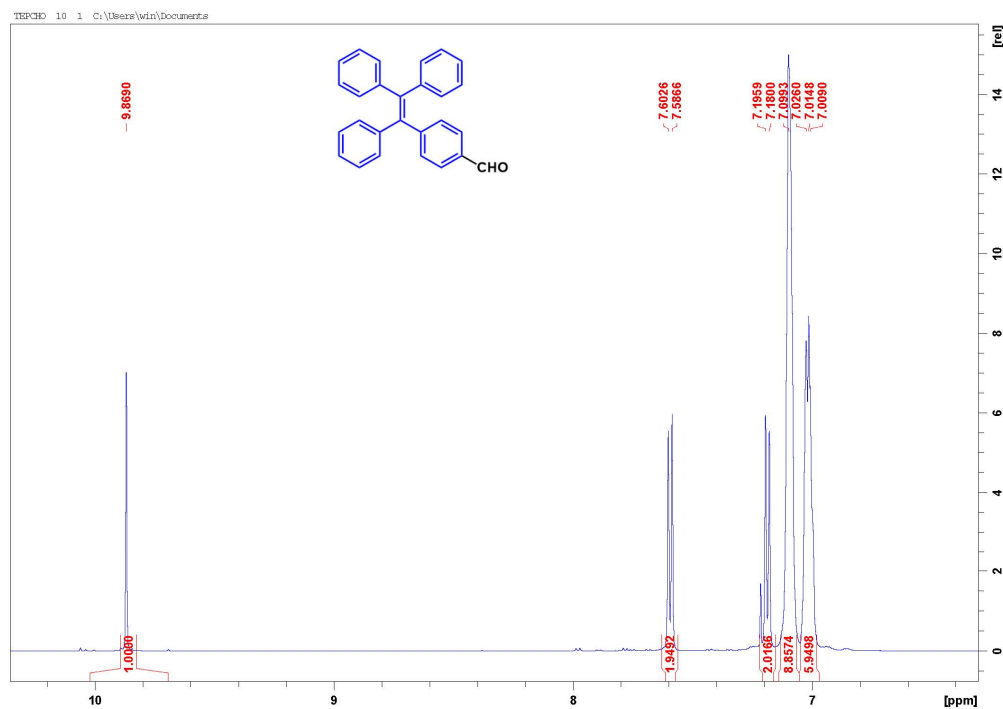

Figure.S7  $^1\text{H}$  NMR of intermediate product TPE-CHO.

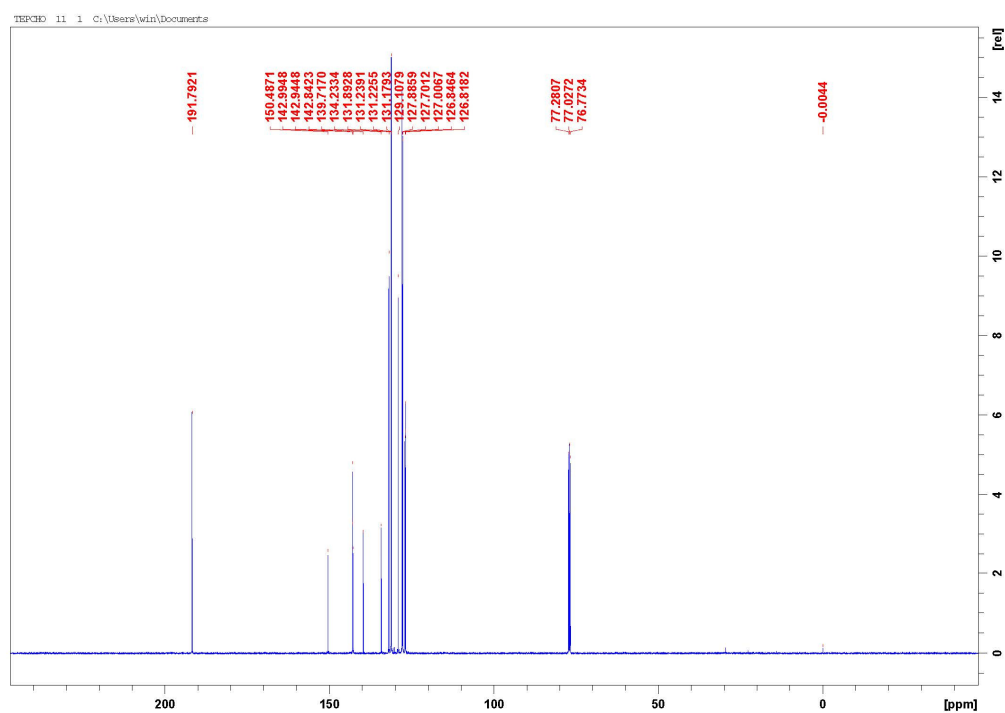Figure.S8  $^{13}\text{C}$  NMR of intermediate product TPE-CHO.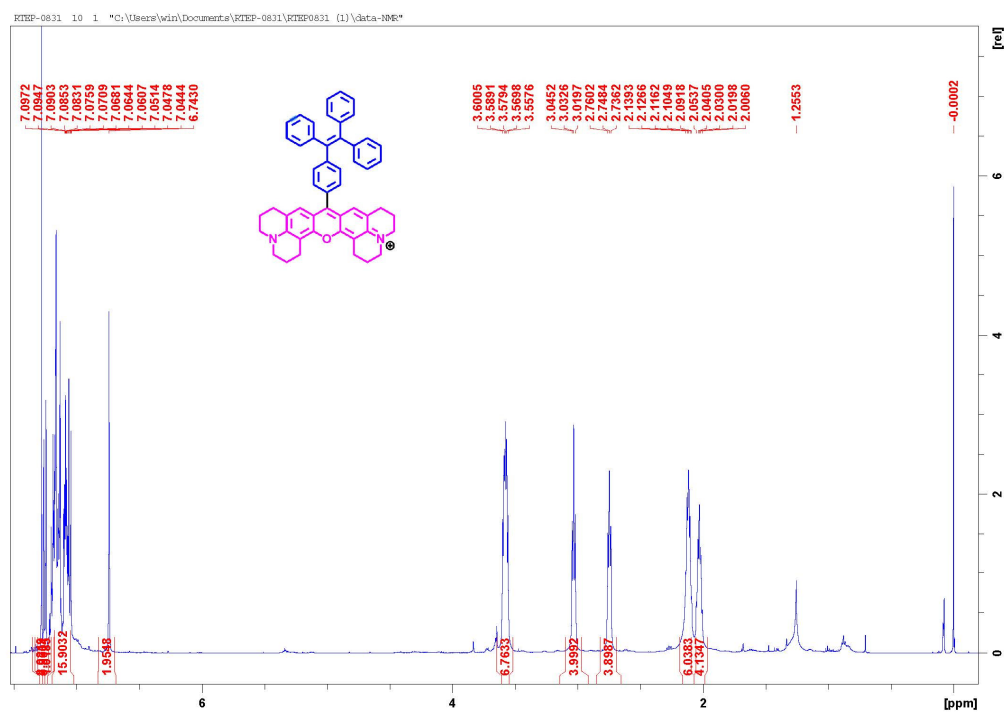Figure.S9  $^1\text{H}$  NMR of intermediate product TPEF.

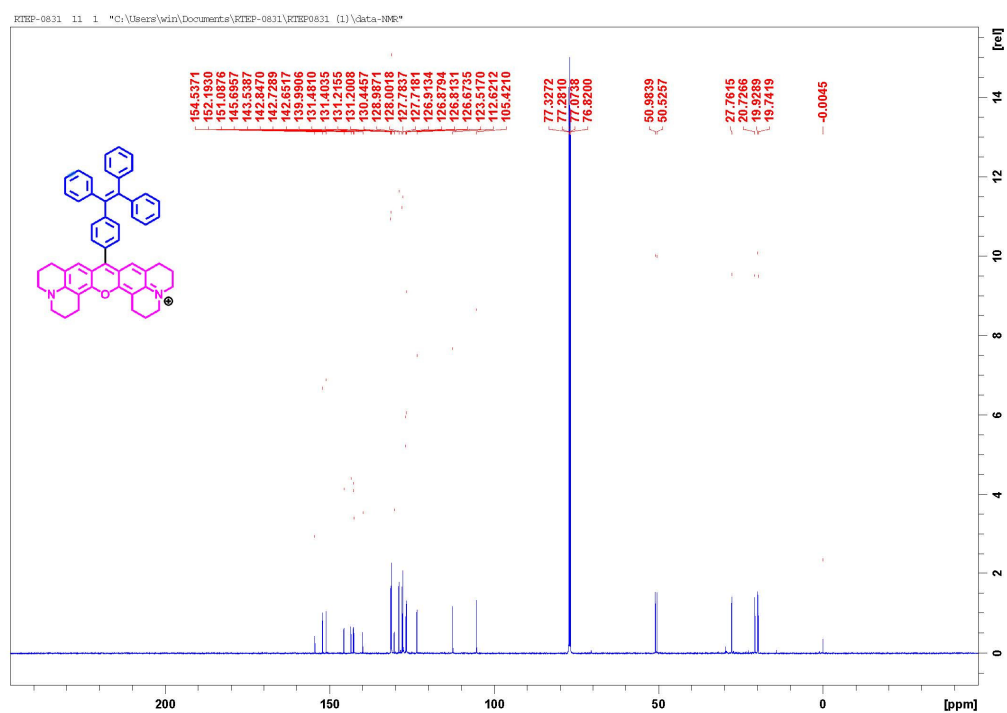Figure.S10  $^{13}\text{C}$  NMR of intermediate product TPEF.

National Center for Organic Mass Spectrometry in Shanghai  
Shanghai Institute of Organic Chemistry  
Chinese Academic of Sciences  
High Resolution ESI-MS REPORT

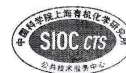

Instrument: Thermo Scientific Q Exactive HF Orbitrap-FTMS

Card Serial Number: E221137

Sample Serial Number: RTEP

Operator: Songw

Date: 2022/07/12

Operation Mode: ESI Positive Ion Mode

Elemental composition search on mass 701.3525

m/z= 696.3525-706.3525

| m/z      | Theo.<br>Mass | Delta<br>(ppm) | RDB<br>equiv. | Composition                                                 |
|----------|---------------|----------------|---------------|-------------------------------------------------------------|
| 701.3525 | 701.3526      | -0.14          | 30.5          | C <sub>51</sub> H <sub>45</sub> O <sub>N</sub> <sub>2</sub> |

RTEP #11 RT: 0.09 AV: 1 NL: 2.33E7  
T: FTMS + p ESI Full ms [100.0000-1000.0000]

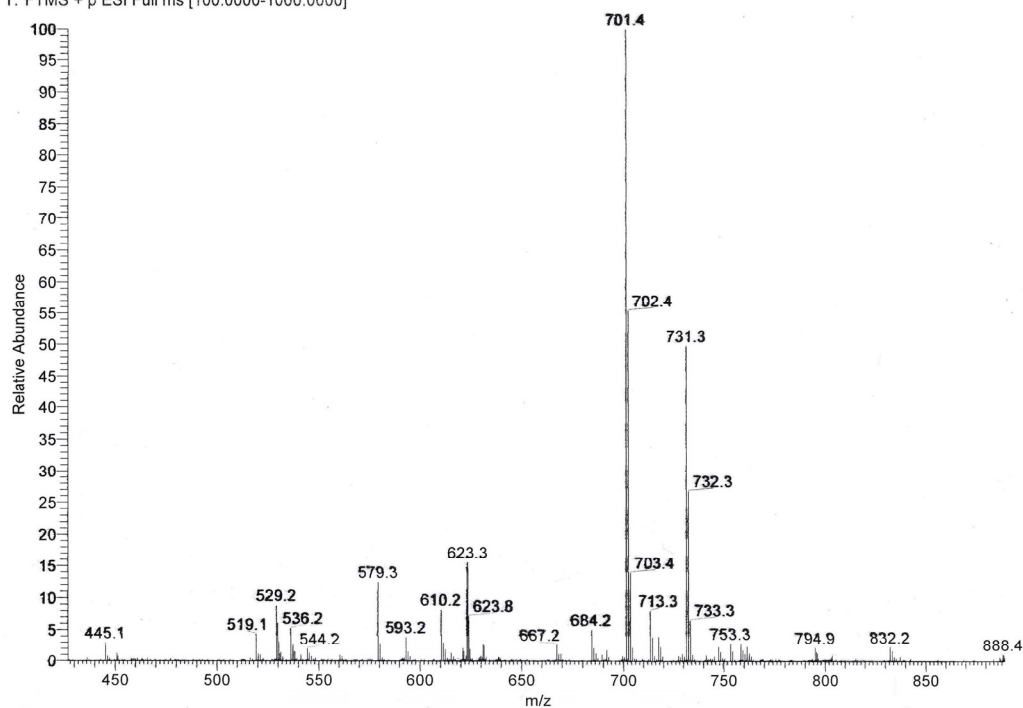

Figure.S11 HRMS of TPEF.
